# Supplementary material
Source: publisher site journal article supplement (https://www.spandidos-publications.com/4510/downloadSupplementary)

Figure S1. mRNA and protein expression levels of UCP2 in scrambled siRNA-transfected and UCP2 siRNA-transfected HK-2 cells. (A) mRNA expression levels of UCP2 were examined following transfection with 40 nM UCP2 siRNA. UCP2 mRNA expression was decreased in cells transfected with UCP2 siRNA compared with in cells transfected with scrambled siRNA. (B) After confirming mRNA expression, protein UCP2 expression was confirmed in 40 nM UCP2 siRNA-transfected cells. It was demonstrated that UCP2 protein expression was significantly reduced in UCP2 siRNA-transfected cells compared with 40 nM scrambled siRNA-transfected cells. \* $P < 0.05$  compared with the control. siRNA, small interfering RNA; UCP2, uncoupling protein 2.

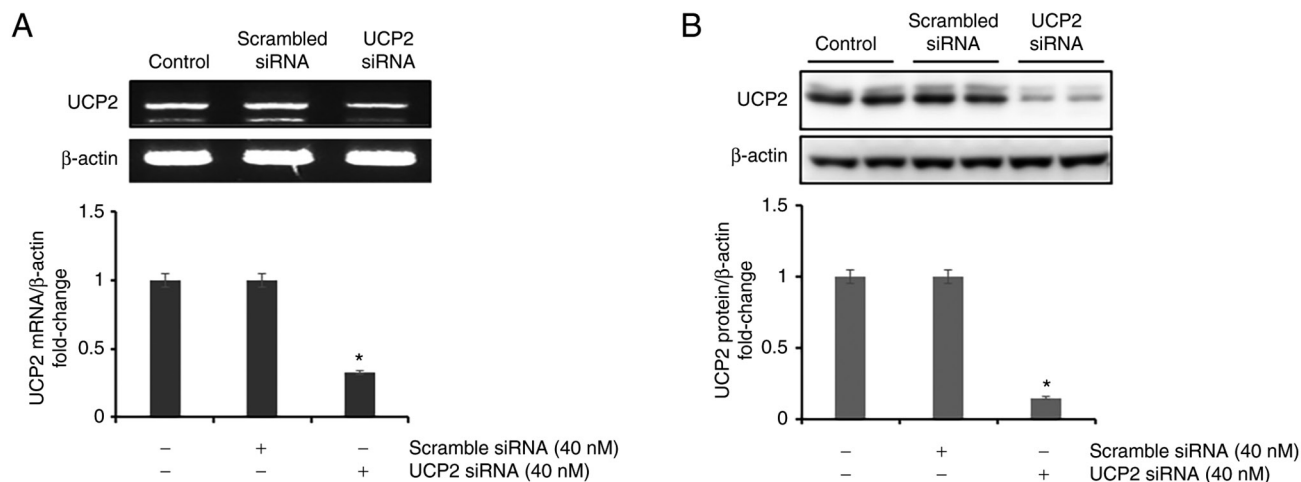

Supplement: Supplementary file 1 [file downloadSupplementary]
